# Supplementary material
Source: PubMed Central journal article supplement (PMC5766264)
Supplement: NIHMS930248-supplement-Suppl.pdf [file NIHMS930248-supplement-Suppl.pdf]

Supplemental Table 1. All metabolites detected in discovery metabolomics and their relationship to neutrophilic airway inflammation

| <b>Metabolite</b>              | <b>Pathway</b> | <b>Correlation*</b> | <b>Ratio*</b> | <b>Q-value</b> |
|--------------------------------|----------------|---------------------|---------------|----------------|
| alanine                        | Amino acid     | 0.68                | 36.89         | 0.009          |
| asparagine                     | Amino acid     | 0.52                | 3.51          | 0.023          |
| aspartate                      | Amino acid     | 0.75                | 11.90         | 0.011          |
| creatine                       | Amino acid     | 0.43                | 1.97          | 0.025          |
| cysteine                       | Amino acid     | 0.68                | 20.14         | 0.014          |
| methionine                     | Amino acid     | 0.60                | 2.70          | 0.023          |
| N-acetylmethionine             | Amino acid     | 0.45                | 2.48          | 0.034          |
| taurine                        | Amino acid     | 0.69                | 8.59          | 0.012          |
| glutamate                      | Amino acid     | 0.76                | 6.06          | 0.011          |
| glutamine                      | Amino acid     | 0.66                | 2.97          | 0.019          |
| pyroglutamine*                 | Amino acid     | 0.42                | 2.09          | 0.035          |
| 5-oxoproline                   | Amino acid     | 0.62                | 4.00          | 0.016          |
| cysteine-glutathione disulfide | Amino acid     | 0.69                | 9.04          | 0.015          |
| glutathione, oxidized (GSSG)   | Amino acid     | 0.34                | 2.52          | 0.032          |
| glycine                        | Amino acid     | 0.63                | 6.95          | 0.016          |
| N-acetylserine                 | Amino acid     | 0.59                | 2.52          | 0.025          |
| serine                         | Amino acid     | 0.76                | 19.97         | 0.009          |
| threonine                      | Amino acid     | 0.80                | 14.71         | 0.008          |
| histidine                      | Amino acid     | 0.64                | 3.64          | 0.019          |
| trans-urocanate                | Amino acid     | 0.34                | 2.13          | 0.039          |
| lysine                         | Amino acid     | 0.75                | 141.81        | 0.007          |
| N6-acetyllysine                | Amino acid     | 0.76                | 12.00         | 0.010          |

|                                          |                        |      |       |       |
|------------------------------------------|------------------------|------|-------|-------|
| phenylalanine                            | Amino acid             | 0.74 | 36.15 | 0.005 |
| tyrosine                                 | Amino acid             | 0.75 | 44.10 | 0.006 |
| putrescine                               | Amino acid             | 0.35 | 6.53  | 0.046 |
| C-glycosyltryptophan*                    | Amino acid             | 0.62 | 8.58  | 0.017 |
| kynurenine                               | Amino acid             | 0.65 | 2.46  | 0.030 |
| tryptophan                               | Amino acid             | 0.73 | 32.66 | 0.010 |
| 5-aminovalerate                          | Amino acid             | 0.45 | 6.87  | 0.025 |
| arginine                                 | Amino acid             | 0.63 | 29.21 | 0.014 |
| citrulline                               | Amino acid             | 0.79 | 24.29 | 0.004 |
| dimethylarginine (SDMA + ADMA)           | Amino acid             | 0.65 | 2.98  | 0.015 |
| ornithine                                | Amino acid             | 0.75 | 71.71 | 0.009 |
| proline                                  | Amino acid             | 0.79 | 13.50 | 0.007 |
| urea                                     | Amino acid             | 0.55 | 3.56  | 0.024 |
| 4-methyl-2-oxopentanoate                 | Amino acid             | 0.50 | 2.34  | 0.037 |
| isoleucine                               | Amino acid             | 0.61 | 6.63  | 0.018 |
| leucine                                  | Amino acid             | 0.37 | 5.42  | 0.040 |
| valine                                   | Amino acid             | 0.76 | 43.61 | 0.004 |
| erythronate*                             | Carbohydrate           | 0.67 | 9.10  | 0.014 |
| 1,5-anhydroglucitol (1,5-AG)             | Carbohydrate           | 0.81 | 6.98  | 0.013 |
| glucose                                  | Carbohydrate           | 0.65 | 9.23  | 0.018 |
| glucose-6-phosphate (G6P)                | Carbohydrate           | 0.54 | 4.39  | 0.028 |
| lactate                                  | Carbohydrate           | 0.71 | 4.14  | 0.012 |
| ascorbate (Vitamin C)                    | Cofactors and vitamins | 0.43 | 6.48  | 0.030 |
| adenosine 5'diphosphoribose              | Cofactors and vitamins | 0.37 | 1.72  | 0.039 |
| nicotinamide                             | Cofactors and vitamins | 0.45 | 3.16  | 0.024 |
| nicotinamide adenine dinucleotide (NAD+) | Cofactors and vitamins | 0.63 | 3.53  | 0.031 |
| pantothenate                             | Cofactors and vitamins | 0.37 | 1.69  | 0.036 |
| citrate                                  | Energy                 | 0.66 | 4.09  | 0.026 |
| fumarate                                 | Energy                 | 0.43 | 2.23  | 0.027 |
| malate                                   | Energy                 | 0.66 | 2.89  | 0.022 |

|                                              |            |       |       |       |
|----------------------------------------------|------------|-------|-------|-------|
| phosphate                                    | Energy     | 0.55  | 4.17  | 0.019 |
| acetylcarnitine                              | Lipid      | 0.50  | 3.64  | 0.021 |
| carnitine                                    | Lipid      | 0.43  | 3.21  | 0.028 |
| linoleate (18:2n6)                           | Lipid      | 0.52  | 3.24  | 0.030 |
| octadecanedioate                             | Lipid      | 0.55  | 1.99  | 0.035 |
| ethanolamine                                 | Lipid      | 0.65  | 7.78  | 0.016 |
| glycerol                                     | Lipid      | 0.57  | 14.37 | 0.037 |
| phosphoethanolamine                          | Lipid      | 0.52  | 4.40  | 0.021 |
| myo-inositol                                 | Lipid      | 0.43  | 2.29  | 0.032 |
| scyllo-inositol                              | Lipid      | 0.53  | 4.50  | 0.032 |
| arachidonate (20:4n6)                        | Lipid      | 0.64  | 9.16  | 0.021 |
| dihomo-linoleate (20:2n6)                    | Lipid      | 0.76  | 12.55 | 0.013 |
| eicosenoate (20:1n9 or 11)                   | Lipid      | 0.70  | 5.96  | 0.017 |
| 1-stearoylglycerophosphoethanolamine         | Lipid      | 0.68  | 2.48  | 0.034 |
| 2-arachidonoylglycerophosphoethanolamine*    | Lipid      | 0.65  | 4.10  | 0.031 |
| 2-docosahexaenoylglycerophosphoethanolamine* | Lipid      | 0.66  | 2.71  | 0.026 |
| 2-oleoylglycerophosphoethanolamine*          | Lipid      | 0.73  | 5.43  | 0.023 |
| caprate (10:0)                               | Lipid      | 0.38  | 1.50  | 0.029 |
| sphingosine                                  | Lipid      | 0.59  | 2.55  | 0.046 |
| cholesterol                                  | Lipid      | 0.67  | 2.10  | 0.027 |
| 2'-deoxyinosine                              | Nucleotide | 0.62  | 3.59  | 0.012 |
| hypoxanthine                                 | Nucleotide | 0.54  | 4.81  | 0.020 |
| xanthine                                     | Nucleotide | 0.76  | 15.06 | 0.005 |
| adenine                                      | Nucleotide | 0.40  | 2.95  | 0.029 |
| adenosine                                    | Nucleotide | -0.69 | 0.22  | 0.018 |
| adenosine 5'-monophosphate (AMP)             | Nucleotide | 0.60  | 4.72  | 0.036 |
| urate                                        | Nucleotide | 0.34  | 2.40  | 0.035 |
| alanylalanine                                | Peptide    | 0.40  | 1.26  | 0.033 |
| alanylleucine                                | Peptide    | 0.82  | 4.36  | 0.003 |
| alanylvaline                                 | Peptide    | 0.81  | 5.79  | 0.000 |

|                        |         |      |       |       |
|------------------------|---------|------|-------|-------|
| alpha-glutamyltyrosine | Peptide | 0.61 | 2.37  | 0.028 |
| alpha-glutamylvaline   | Peptide | 0.77 | 48.79 | 0.002 |
| aspartylleucine        | Peptide | 0.78 | 29.57 | 0.002 |
| aspartylphenylalanine  | Peptide | 0.73 | 15.02 | 0.011 |
| glycylisoleucine       | Peptide | 0.78 | 8.61  | 0.001 |
| glycylleucine          | Peptide | 0.73 | 33.94 | 0.005 |
| glycylproline          | Peptide | 0.60 | 3.16  | 0.020 |
| glycylvaline           | Peptide | 0.76 | 11.96 | 0.001 |
| isoleucylvaline        | Peptide | 0.74 | 4.28  | 0.008 |
| leucylleucine          | Peptide | 0.50 | 1.93  | 0.022 |
| lysylleucine           | Peptide | 0.79 | 5.39  | 0.003 |
| pyroglutamylvaline     | Peptide | 0.82 | 10.26 | 0.007 |
| serylleucine           | Peptide | 0.76 | 6.00  | 0.004 |
| threonylleucine        | Peptide | 0.78 | 3.31  | 0.006 |
| threonylphenylalanine  | Peptide | 0.79 | 10.36 | 0.002 |

\*Correlation = Pearson correlation to BALF % neutrophils; Ratio = ratio of metabolite concentrations in samples with bronchitis to those with no/mild bronchitis
